# Supplementary material
Source: publisher figshare collection journal article supplement (https://acs.figshare.com/ndownloader/files/4651063)
Supplement: Supplementary file 1 [file 4651063]

 
data_Compound2
 
# Authors:  J. Campo, L. R. Falvello, I. Mayoral, F. Palacio, T. Soler
#           and M. Tomas
# Title: Reversible Single-Crystal-to-Single-Crystal Crosslinking of a
#        Ribbon of Cobalt Citrate Cubanes to Form a 2D Net


_vrf_PLAT220_Compound2 
;
PROBLEM: Large Non-Solvent O Ueq(max)/Ueq(min) ... 9.11 Ratio 
RESPONSE:

(N.b., CheckCIF will also insert this VRF text below a second 
PLAT220 alert, that one regarding C atoms. This explanation applies
only to the Level A alert regarding oxygen.)

Here is the explanation of this test:
PLAT220 Type_2 Test Ueq(max)/Ueq(Min) range for non-H atoms in non-solvent 
This test reports on a larger than usual U(eq) range for the specified element 
type in the non-solvent/anion part of the structure. Too high or too low Ueq's 
may be an indication for incorrectly identified atomic species 
(i.e. O versus N). 

Our Reply:
As with Compound 1, in the present structure the displacement parameters 
actually behave much better than one had a right to expect.
Once again there is one outlier as far as U(eq) goes; but this time it
is citrate carboxylate oxygen atom O5, with U(eq) = 0.174(10) \%A^2^.
In Compound 1 this oxygen atom had a very reasonable U(eq). It was 
part of the coordination shell around Cs1, with Cs1...O5 = 3.463(6) \%A.
After the transition at T = 303 K, Cs1 is now disordered over two positions,
which are here called Cs1A and Cs1B. Some of the oxygen atoms that were
previously in contact with Cs1 have left the crystal; and there are other
significant changes in the coordination about the two disordered Cs1 positions.
O5 is at 3.59(2) \%A from Cs1A and is too far from Cs1B to be considered a
meaningful contact distance.  We believe that the large and anisotropic
displacement parameters for O5 represent disorder at this position. We did
not attempt to split the site or in any other way define the disorder.
In the context of the purpose of this test, this atom must be oxygen.
;

_vrf_CHEMW03_Compound2 
;
RESPONSE:  Water hydrogen atoms are not present in the coordinates list.
Their presence is reflected in the formulas given and in the values 
calculated
for crystal density, etc.  This causes the discrepancy between the values
we give for the formula, etc., and the values that Platon calculates from 
the atoms list. So this reply also applies to the alerts for
the moiety formula, the molecular weight, the density Dx and F000.
Those are the following alerts PLAT043, PLAT044, PLAT041, PLAT051, and
PLAT068.
;
 
_audit_creation_method            SHELXL-97 
_chemical_name_systematic 
; 
 ? 
; 
_chemical_name_common             ? 
_chemical_melting_point           ? 
_chemical_formula_moiety          ? 
_chemical_formula_sum 
 'C48 H86 Co14 Cs4 O83' 
_chemical_formula_weight          3347.83 
 
loop_ 
 _atom_type_symbol 
 _atom_type_description 
 _atom_type_scat_dispersion_real 
 _atom_type_scat_dispersion_imag 
 _atom_type_scat_source 
 'C'  'C'   0.0033   0.0016 
 'International Tables Vol C Tables 4.2.6.8 and 6.1.1.4' 
 'H'  'H'   0.0000   0.0000 
 'International Tables Vol C Tables 4.2.6.8 and 6.1.1.4' 
 'O'  'O'   0.0106   0.0060 
 'International Tables Vol C Tables 4.2.6.8 and 6.1.1.4' 
 'Co'  'Co'   0.3494   0.9721 
 'International Tables Vol C Tables 4.2.6.8 and 6.1.1.4' 
 'Cs'  'Cs'  -0.3680   2.1192 
 'International Tables Vol C Tables 4.2.6.8 and 6.1.1.4' 
 
_symmetry_cell_setting            triclinic 
_symmetry_space_group_name_H-M    'P -1' 
 
loop_ 
 _symmetry_equiv_pos_as_xyz 
 'x, y, z' 
 '-x, -y, -z' 
 
_cell_length_a                    11.4050(5) 
_cell_length_b                    13.0515(9) 
_cell_length_c                    18.4855(9) 
_cell_angle_alpha                 101.734(5) 
_cell_angle_beta                  95.682(4) 
_cell_angle_gamma                 115.790(5) 
_cell_volume                      2370.3(2) 
_cell_formula_units_Z             1 
#
# N.b., Z = 1 here in order to maintain integer 
# stoichiometry.
#
_cell_measurement_temperature     303(1) 
_cell_measurement_reflns_used     10838 
_cell_measurement_theta_min       5.08 
_cell_measurement_theta_max       29.00
 
_exptl_crystal_description        plate 
_exptl_crystal_colour             pink 
_exptl_crystal_size_max           0.28 
_exptl_crystal_size_mid           0.15 
_exptl_crystal_size_min           0.04 
_exptl_crystal_density_meas       ? 
_exptl_crystal_density_diffrn     2.345 
_exptl_crystal_density_method     'not measured' 
_exptl_crystal_F_000              1636 
_exptl_absorpt_coefficient_mu     4.023 
_exptl_absorpt_correction_type    multi-scan 
_exptl_absorpt_correction_T_min   0.5665 
_exptl_absorpt_correction_T_max   1.2761 
_exptl_absorpt_process_details    
;
ABSPACK in CrysAlis RED (Oxford Diffraction, 2006)
; 
 
_exptl_special_details 
; 
 ? 
; 
 
_diffrn_ambient_temperature       303(1) 
_diffrn_radiation_wavelength      0.71073 
_diffrn_radiation_type            MoK\a 
_diffrn_radiation_source          'fine-focus sealed tube' 
_diffrn_radiation_monochromator   graphite 
_diffrn_measurement_device_type   'Oxford Diffraction Xcalibur S3' 
_diffrn_measurement_method       '\f- and \w-scans' 
_diffrn_detector_area_resol_mean  16.0655 
_diffrn_standards_number          0 
_diffrn_standards_interval_count  . 
_diffrn_standards_interval_time   . 
_diffrn_standards_decay_%         0 
_diffrn_reflns_number             37985 
_diffrn_reflns_av_R_equivalents   0.0769 
_diffrn_reflns_av_sigmaI/netI     0.0961 
_diffrn_reflns_limit_h_min        -14 
_diffrn_reflns_limit_h_max        14 
_diffrn_reflns_limit_k_min        -16 
_diffrn_reflns_limit_k_max        16 
_diffrn_reflns_limit_l_min        -24 
_diffrn_reflns_limit_l_max        24 
_diffrn_reflns_theta_min          3.66 
_diffrn_reflns_theta_max          27.50 
_reflns_number_total              10793 
_reflns_number_gt                 7356 
_reflns_threshold_expression      I>2\s(I) 
 
_computing_data_collection
;
CrysAlis CCD (Oxford Diffraction Ltd., 2006)
;
_computing_cell_refinement
;
CrysAlis RED (Oxford Diffraction Ltd., 2006)
;
_computing_data_reduction
;
CrysAlis RED (Oxford Diffraction Ltd., 2006)

;
_computing_structure_solution     'SHELXS-97 (Sheldrick, 1990)' 
_computing_structure_refinement   'SHELXL-97 (Sheldrick, 1997)' 
_computing_molecular_graphics     'DIAMOND (Brandenburg, 2007)' 
_computing_publication_material    'SHELXL-97 (Sheldrick, 1997)' 

_publ_section_references
;

Brandenburg, K. (2007). <i>DIAMOND</i>. Release 3.1e. Crystal Impact GbR, Bonn,
Germany.

Oxford Diffraction Ltd. (2006) <i>CrysAlis CCD</i>. Version 1.171.32.4 (Release
27-04-2006 CrysAlis171 .NET).

Oxford Diffraction Ltd. (2006) <i>CrysAlis RED</i>. Version 1.171.32.4 (Release
27-04-2006 CrysAlis171 .NET).

Sheldrick, G. M. (1990). <i>Acta Cryst.</i> A<b>46</b>, 467--473.

Sheldrick, G. M. (1997). <i>SHELXL97</i>. Release 97-2. University of
G\"ottingen, Germany.

;
 
_refine_special_details 
; 
 Refinement of F^2^ against ALL reflections.  The weighted R-factor wR and 
 goodness of fit S are based on F^2^, conventional R-factors R are based 
 on F, with F set to zero for negative F^2^. The threshold expression of 
 F^2^ > 2sigma(F^2^) is used only for calculating R-factors(gt) etc. and is 
 not relevant to the choice of reflections for refinement.  R-factors based 
 on F^2^ are statistically about twice as large as those based on F, and R- 
 factors based on ALL data will be even larger. 
; 
 
_refine_ls_structure_factor_coef  Fsqd  
_refine_ls_matrix_type            full 
_refine_ls_weighting_scheme       calc  
_refine_ls_weighting_details 
 'calc w=1/[\s^2^(Fo^2^)+(0.0987P)^2^+14.7164P] where P=(Fo^2^+2Fc^2^)/3' 
_atom_sites_solution_primary      direct 
_atom_sites_solution_secondary    difmap 
_atom_sites_solution_hydrogens    geom 
_refine_ls_hydrogen_treatment     constr 
_refine_ls_extinction_method      none 
_refine_ls_extinction_coef        ? 
_refine_ls_number_reflns          10793 
_refine_ls_number_parameters      688 
_refine_ls_number_restraints      0 
_refine_ls_R_factor_all           0.1377 
_refine_ls_R_factor_gt            0.0860 
_refine_ls_wR_factor_ref          0.2174 
_refine_ls_wR_factor_gt           0.1944 
_refine_ls_goodness_of_fit_ref    1.095 
_refine_ls_restrained_S_all       1.095 
_refine_ls_shift/su_max           0.003 
_refine_ls_shift/su_mean          0.000 
 
loop_ 
 _atom_site_label 
 _atom_site_type_symbol 
 _atom_site_fract_x 
 _atom_site_fract_y 
 _atom_site_fract_z 
 _atom_site_U_iso_or_equiv 
 _atom_site_adp_type 
 _atom_site_occupancy 
 _atom_site_symmetry_multiplicity 
 _atom_site_calc_flag 
 _atom_site_refinement_flags 
 _atom_site_disorder_assembly 
 _atom_site_disorder_group 
Cs1A Cs 0.1727(2) 0.6399(2) 0.32379(18) 0.0688(7) Uani 0.50 1 d P . . 
Cs1B Cs 0.2547(4) 0.6792(3) 0.34700(16) 0.0875(9) Uani 0.50 1 d P . . 
Cs2 Cs 0.61551(8) 0.74588(9) 0.19017(5) 0.0609(3) Uani 1 1 d . . . 
Co1 Co 0.34460(11) 0.16291(11) 0.14229(7) 0.0207(3) Uani 1 1 d . . . 
Co2 Co 0.56540(11) 0.35317(11) 0.28685(7) 0.0215(3) Uani 1 1 d . . . 
Co3 Co 0.52491(12) 0.09151(11) 0.24102(7) 0.0232(3) Uani 1 1 d . . . 
Co4 Co 0.29832(11) 0.15377(11) 0.30401(7) 0.0219(3) Uani 1 1 d . . . 
Co5 Co 0.25822(14) 0.22362(12) 0.58441(8) 0.0323(3) Uani 1 1 d . . . 
Co6 Co 1.0000 0.5000 0.5000 0.0276(4) Uani 1 2 d S . . 
Co7 Co 0.73776(13) -0.01792(13) 0.08144(8) 0.0317(3) Uani 1 1 d . . . 
Co8 Co 0.0000 0.5000 0.0000 0.0277(4) Uani 1 2 d S . . 
O1 O 0.5453(6) 0.2292(5) 0.1878(3) 0.0227(13) Uani 1 1 d . . . 
O2 O 0.6199(7) 0.0673(6) 0.1510(4) 0.0329(16) Uani 1 1 d . . . 
O3 O 0.7353(7) 0.1428(6) 0.0719(4) 0.0371(18) Uani 1 1 d . . . 
O4 O 0.6845(8) 0.4852(6) 0.2425(4) 0.0382(18) Uani 1 1 d . . . 
O5 O 0.8649(19) 0.5597(10) 0.2003(10) 0.174(10) Uani 1 1 d . . . 
O6 O 0.3820(6) 0.0996(6) 0.0367(4) 0.0307(15) Uani 1 1 d . . . 
O7 O 0.4638(7) 0.1642(7) -0.0561(4) 0.0363(17) Uani 1 1 d . . . 
O8 O 0.3641(5) 0.2811(5) 0.2451(3) 0.0198(13) Uani 1 1 d . . . 
O9 O 0.2997(6) 0.2684(6) 0.0898(4) 0.0273(14) Uani 1 1 d . . . 
O10 O 0.1843(8) 0.3615(7) 0.0706(5) 0.0422(19) Uani 1 1 d . . . 
O11 O 0.5444(7) 0.4925(6) 0.3602(4) 0.0312(15) Uani 1 1 d . . . 
O12 O 0.5592(7) 0.6603(6) 0.3414(4) 0.0372(17) Uani 1 1 d . . . 
O13 O 0.2467(7) 0.2805(6) 0.3600(4) 0.0319(16) Uani 1 1 d . . . 
O14 O 0.2135(8) 0.4327(7) 0.3481(5) 0.044(2) Uani 1 1 d . . . 
O15 O 0.5079(5) 0.2077(5) 0.3310(3) 0.0192(12) Uani 1 1 d . . . 
O16 O 0.7297(6) 0.4045(6) 0.3715(4) 0.0346(16) Uani 1 1 d . . . 
O17 O 0.7966(6) 0.3764(6) 0.4799(4) 0.0302(15) Uani 1 1 d . . . 
O18 O 0.7051(6) 0.1268(7) 0.3078(4) 0.0328(16) Uani 1 1 d . . . 
O19 O 0.8148(7) 0.1255(7) 0.4118(4) 0.0398(18) Uani 1 1 d . . . 
O20 O 0.3434(8) 0.1333(7) 0.5217(4) 0.0374(17) Uani 1 1 d . . . 
O21 O 0.2902(6) 0.0900(6) 0.3979(4) 0.0330(16) Uani 1 1 d . . . 
O22 O 0.3225(5) 0.0495(5) 0.2101(3) 0.0196(13) Uani 1 1 d . . . 
O23 O 0.4610(7) -0.0838(6) 0.2417(4) 0.0330(16) Uani 1 1 d . . . 
O24 O 0.3313(7) -0.2744(6) 0.1915(4) 0.0360(17) Uani 1 1 d . . . 
O25 O 0.1467(6) 0.0285(6) 0.0986(4) 0.0290(15) Uani 1 1 d . . . 
O26 O 0.0158(7) -0.1605(6) 0.0857(5) 0.0405(19) Uani 1 1 d . . . 
O27 O 0.0898(6) 0.0383(6) 0.2655(4) 0.0302(15) Uani 1 1 d . . . 
O28 O -0.0553(8) -0.1375(7) 0.2702(5) 0.050(2) Uani 1 1 d . . . 
O1W O 0.1677(8) 0.3013(7) 0.6548(5) 0.0440(19) Uani 1 1 d . . . 
O2W O 0.2732(10) 0.3404(7) 0.5194(5) 0.052(2) Uani 1 1 d . . . 
O3W O 0.2097(9) 0.0954(7) 0.6444(5) 0.051(2) Uani 1 1 d . . . 
O4W O 0.0685(11) 0.1186(10) 0.5068(9) 0.103(5) Uani 1 1 d . . . 
O5W O 0.9823(8) 0.6252(8) 0.5793(6) 0.064(3) Uani 1 1 d . . . 
O6W O 0.9738(8) 0.5797(8) 0.4143(5) 0.055(2) Uani 1 1 d . . . 
O7W O 0.8270(8) 0.0247(8) 0.2003(4) 0.044(2) Uani 1 1 d . . . 
O8W O 0.7750(7) -0.1681(7) 0.0638(5) 0.0442(19) Uani 1 1 d . . . 
O9W O 0.9335(8) 0.0728(8) 0.0625(5) 0.048(2) Uani 1 1 d . . . 
O10W O -0.0523(8) 0.3572(7) 0.0525(5) 0.045(2) Uani 1 1 d . . . 
O11W O 0.1991(8) 0.5687(7) 0.0555(5) 0.0439(19) Uani 1 1 d . . . 
O12W O -0.0352(9) 0.6066(7) 0.0842(5) 0.045(2) Uani 1 1 d . . . 
C1 C 0.6404(9) 0.2543(8) 0.1420(5) 0.025(2) Uani 1 1 d . . . 
C2 C 0.6665(9) 0.1470(9) 0.1197(5) 0.025(2) Uani 1 1 d . . . 
C3 C 0.7754(10) 0.3610(10) 0.1880(7) 0.045(3) Uani 1 1 d . . . 
H3A H 0.8012 0.3443 0.2340 0.054 Uiso 1 1 calc R . . 
H3B H 0.8431 0.3681 0.1586 0.054 Uiso 1 1 calc R . . 
C4 C 0.7734(14) 0.4740(12) 0.2080(7) 0.062(4) Uani 1 1 d . . . 
C5 C 0.5934(9) 0.2783(9) 0.0695(5) 0.027(2) Uani 1 1 d . . . 
H5A H 0.5716 0.3427 0.0839 0.033 Uiso 1 1 calc R . . 
H5B H 0.6674 0.3054 0.0443 0.033 Uiso 1 1 calc R . . 
C6 C 0.4772(10) 0.1777(9) 0.0143(6) 0.030(2) Uani 1 1 d . . . 
C7 C 0.2997(9) 0.3542(8) 0.2512(5) 0.025(2) Uani 1 1 d . . . 
C8 C 0.1810(9) 0.3026(9) 0.1840(6) 0.028(2) Uani 1 1 d . . . 
H8A H 0.1254 0.2196 0.1799 0.034 Uiso 1 1 calc R . . 
H8B H 0.1276 0.3430 0.1936 0.034 Uiso 1 1 calc R . . 
C9 C 0.2230(9) 0.3142(8) 0.1115(6) 0.026(2) Uani 1 1 d . . . 
C10 C 0.3983(9) 0.4820(8) 0.2525(6) 0.028(2) Uani 1 1 d . . . 
H10A H 0.4390 0.4793 0.2090 0.034 Uiso 1 1 calc R . . 
H10B H 0.3491 0.5259 0.2480 0.034 Uiso 1 1 calc R . . 
C11 C 0.5081(10) 0.5480(9) 0.3239(6) 0.029(2) Uani 1 1 d . . . 
C12 C 0.2512(9) 0.3555(9) 0.3274(6) 0.028(2) Uani 1 1 d . . . 
C13 C 0.5779(8) 0.2347(8) 0.4048(5) 0.0213(19) Uani 1 1 d . . . 
C14 C 0.7127(8) 0.3481(8) 0.4201(5) 0.024(2) Uani 1 1 d . . . 
C15 C 0.6087(9) 0.1356(9) 0.4166(6) 0.029(2) Uani 1 1 d . . . 
H15A H 0.5275 0.0608 0.3989 0.034 Uiso 1 1 calc R . . 
H15B H 0.6387 0.1493 0.4703 0.034 Uiso 1 1 calc R . . 
C16 C 0.7153(9) 0.1269(8) 0.3752(6) 0.028(2) Uani 1 1 d . . . 
C17 C 0.5005(9) 0.2593(9) 0.4621(6) 0.030(2) Uani 1 1 d . . . 
H17A H 0.5561 0.2872 0.5123 0.037 Uiso 1 1 calc R . . 
H17B H 0.4826 0.3226 0.4538 0.037 Uiso 1 1 calc R . . 
C18 C 0.3702(9) 0.1546(9) 0.4599(6) 0.028(2) Uani 1 1 d . . . 
C19 C 0.2222(9) -0.0662(8) 0.1766(5) 0.0235(19) Uani 1 1 d . . . 
C20 C 0.2808(9) -0.1428(8) 0.1379(5) 0.026(2) Uani 1 1 d . . . 
H20A H 0.2087 -0.2169 0.1057 0.031 Uiso 1 1 calc R . . 
H20B H 0.3365 -0.1024 0.1059 0.031 Uiso 1 1 calc R . . 
C21 C 0.3628(9) -0.1691(9) 0.1937(6) 0.028(2) Uani 1 1 d . . . 
C22 C 0.1180(9) -0.0686(9) 0.1153(6) 0.028(2) Uani 1 1 d . . . 
C23 C 0.1470(10) -0.1197(8) 0.2374(6) 0.027(2) Uani 1 1 d . . . 
H23A H 0.0957 -0.2050 0.2173 0.032 Uiso 1 1 calc R . . 
H23B H 0.2118 -0.1031 0.2821 0.032 Uiso 1 1 calc R . . 
C24 C 0.0542(9) -0.0689(9) 0.2595(6) 0.027(2) Uani 1 1 d . . . 
O13W O 0.1479(9) 0.8513(8) 0.4325(5) 0.056(2) Uani 1 1 d . . . 
O14W O 0.441(2) 0.839(2) 0.3728(12) 0.076(6) Uani 0.50 1 d P . . 
 
loop_ 
 _atom_site_aniso_label 
 _atom_site_aniso_U_11 
 _atom_site_aniso_U_22 
 _atom_site_aniso_U_33 
 _atom_site_aniso_U_23 
 _atom_site_aniso_U_13 
 _atom_site_aniso_U_12 
Cs1A 0.0660(13) 0.0700(15) 0.088(2) 0.0369(13) 0.0258(13) 0.0383(13) 
Cs1B 0.162(3) 0.096(2) 0.0636(17) 0.0373(15) 0.048(2) 0.101(2) 
Cs2 0.0488(5) 0.0778(6) 0.0569(6) 0.0344(5) 0.0134(4) 0.0229(4) 
Co1 0.0176(6) 0.0239(6) 0.0224(7) 0.0056(5) 0.0041(5) 0.0116(5) 
Co2 0.0181(6) 0.0212(6) 0.0246(7) 0.0043(5) 0.0054(5) 0.0093(5) 
Co3 0.0201(6) 0.0255(7) 0.0253(7) 0.0041(5) 0.0030(5) 0.0135(5) 
Co4 0.0177(6) 0.0242(6) 0.0239(7) 0.0054(5) 0.0059(5) 0.0101(5) 
Co5 0.0344(7) 0.0285(7) 0.0314(8) 0.0050(6) 0.0115(6) 0.0130(6) 
Co6 0.0175(8) 0.0358(11) 0.0260(10) 0.0038(8) 0.0029(7) 0.0118(8) 
Co7 0.0315(7) 0.0355(8) 0.0312(8) 0.0076(6) 0.0026(6) 0.0198(6) 
Co8 0.0286(9) 0.0285(10) 0.0302(11) 0.0077(8) 0.0068(8) 0.0169(8) 
O1 0.020(3) 0.025(3) 0.021(3) 0.003(3) 0.006(3) 0.011(3) 
O2 0.039(4) 0.039(4) 0.032(4) 0.006(3) 0.004(3) 0.030(3) 
O3 0.037(4) 0.041(4) 0.045(5) 0.008(3) 0.019(3) 0.029(3) 
O4 0.046(4) 0.024(4) 0.038(4) 0.007(3) 0.016(4) 0.009(3) 
O5 0.239(18) 0.036(6) 0.218(18) 0.021(8) 0.205(17) 0.013(8) 
O6 0.028(3) 0.035(4) 0.032(4) 0.009(3) 0.009(3) 0.017(3) 
O7 0.046(4) 0.051(5) 0.013(4) 0.001(3) 0.002(3) 0.028(4) 
O8 0.012(3) 0.022(3) 0.024(3) 0.001(3) 0.005(2) 0.008(2) 
O9 0.031(3) 0.034(4) 0.027(4) 0.011(3) 0.010(3) 0.021(3) 
O10 0.050(4) 0.053(5) 0.047(5) 0.024(4) 0.011(4) 0.040(4) 
O11 0.036(4) 0.024(4) 0.031(4) 0.003(3) 0.002(3) 0.014(3) 
O12 0.038(4) 0.025(4) 0.036(4) -0.005(3) -0.005(3) 0.012(3) 
O13 0.042(4) 0.035(4) 0.032(4) 0.015(3) 0.022(3) 0.025(3) 
O14 0.066(5) 0.042(4) 0.053(5) 0.021(4) 0.036(4) 0.042(4) 
O15 0.016(3) 0.018(3) 0.019(3) 0.001(2) -0.002(2) 0.007(2) 
O16 0.022(3) 0.033(4) 0.043(5) 0.012(3) 0.001(3) 0.008(3) 
O17 0.022(3) 0.041(4) 0.022(4) 0.006(3) 0.002(3) 0.012(3) 
O18 0.025(3) 0.050(5) 0.025(4) 0.005(3) 0.003(3) 0.022(3) 
O19 0.043(4) 0.051(5) 0.039(4) 0.010(4) 0.002(3) 0.036(4) 
O20 0.053(4) 0.044(4) 0.034(4) 0.021(4) 0.023(4) 0.031(4) 
O21 0.023(3) 0.045(4) 0.030(4) 0.017(3) 0.007(3) 0.012(3) 
O22 0.014(3) 0.018(3) 0.022(3) 0.002(3) 0.002(2) 0.006(2) 
O23 0.028(3) 0.023(4) 0.041(4) 0.004(3) -0.010(3) 0.011(3) 
O24 0.045(4) 0.028(4) 0.037(4) 0.008(3) -0.002(3) 0.022(3) 
O25 0.017(3) 0.037(4) 0.034(4) 0.011(3) 0.005(3) 0.014(3) 
O26 0.026(4) 0.030(4) 0.052(5) -0.003(4) -0.013(3) 0.011(3) 
O27 0.024(3) 0.031(4) 0.042(4) 0.013(3) 0.011(3) 0.016(3) 
O28 0.036(4) 0.036(4) 0.080(6) 0.019(4) 0.033(4) 0.014(4) 
O1W 0.046(4) 0.046(5) 0.044(5) 0.007(4) 0.021(4) 0.025(4) 
O2W 0.080(6) 0.043(5) 0.036(5) 0.008(4) 0.008(4) 0.033(5) 
O3W 0.067(5) 0.047(5) 0.056(5) 0.021(4) 0.043(5) 0.032(4) 
O4W 0.054(6) 0.057(7) 0.163(13) 0.011(8) -0.033(7) 0.015(5) 
O5W 0.048(5) 0.048(5) 0.087(7) 0.000(5) 0.042(5) 0.016(4) 
O6W 0.040(4) 0.047(5) 0.060(6) 0.021(4) -0.014(4) 0.009(4) 
O7W 0.043(4) 0.069(6) 0.033(4) 0.011(4) 0.004(3) 0.038(4) 
O8W 0.037(4) 0.053(5) 0.047(5) 0.008(4) 0.007(4) 0.029(4) 
O9W 0.038(4) 0.074(6) 0.041(5) 0.022(4) 0.012(4) 0.030(4) 
O10W 0.043(4) 0.059(5) 0.056(5) 0.032(4) 0.023(4) 0.035(4) 
O11W 0.040(4) 0.040(4) 0.047(5) -0.001(4) -0.004(4) 0.023(4) 
O12W 0.066(5) 0.032(4) 0.046(5) 0.014(4) 0.022(4) 0.028(4) 
C1 0.020(4) 0.033(5) 0.029(5) 0.009(4) 0.015(4) 0.017(4) 
C2 0.020(4) 0.032(5) 0.026(5) 0.001(4) 0.000(4) 0.018(4) 
C3 0.027(5) 0.050(7) 0.041(7) -0.006(6) 0.014(5) 0.009(5) 
C4 0.061(8) 0.049(8) 0.040(7) -0.003(6) 0.036(7) -0.005(6) 
C5 0.023(5) 0.036(5) 0.028(5) 0.011(4) 0.013(4) 0.016(4) 
C6 0.029(5) 0.035(6) 0.041(6) 0.012(5) 0.009(4) 0.027(5) 
C7 0.031(5) 0.030(5) 0.023(5) 0.006(4) 0.014(4) 0.020(4) 
C8 0.025(5) 0.032(5) 0.033(6) 0.008(4) 0.007(4) 0.018(4) 
C9 0.024(5) 0.020(5) 0.027(5) 0.000(4) -0.002(4) 0.009(4) 
C10 0.027(5) 0.022(5) 0.031(6) 0.003(4) 0.008(4) 0.008(4) 
C11 0.033(5) 0.031(5) 0.027(5) 0.003(4) 0.013(4) 0.018(5) 
C12 0.024(5) 0.034(5) 0.033(6) 0.006(5) 0.014(4) 0.017(4) 
C13 0.018(4) 0.029(5) 0.021(5) 0.008(4) 0.002(4) 0.015(4) 
C14 0.017(4) 0.033(5) 0.023(5) 0.000(4) 0.004(4) 0.016(4) 
C15 0.022(5) 0.037(6) 0.028(5) 0.007(4) 0.004(4) 0.016(4) 
C16 0.027(5) 0.023(5) 0.037(6) 0.006(4) 0.008(4) 0.016(4) 
C17 0.025(5) 0.042(6) 0.025(5) 0.000(4) 0.002(4) 0.021(5) 
C18 0.026(5) 0.039(6) 0.026(5) 0.010(5) 0.006(4) 0.021(5) 
C19 0.020(4) 0.025(5) 0.024(5) 0.007(4) 0.008(4) 0.009(4) 
C20 0.026(5) 0.025(5) 0.030(5) 0.007(4) 0.007(4) 0.015(4) 
C21 0.030(5) 0.035(6) 0.033(6) 0.012(5) 0.013(4) 0.025(5) 
C22 0.017(4) 0.030(5) 0.033(6) 0.005(4) 0.004(4) 0.010(4) 
C23 0.032(5) 0.018(5) 0.028(5) 0.006(4) 0.010(4) 0.008(4) 
C24 0.019(4) 0.033(5) 0.028(5) 0.009(4) 0.009(4) 0.012(4) 
O13W 0.053(5) 0.069(6) 0.029(5) 0.005(4) -0.009(4) 0.020(5) 
O14W 0.089(15) 0.109(18) 0.067(14) 0.034(13) 0.022(12) 0.074(14) 
 
_geom_special_details 
; 
 All esds (except the esd in the dihedral angle between two l.s. planes) 
 are estimated using the full covariance matrix.  The cell esds are taken 
 into account individually in the estimation of esds in distances, angles 
 and torsion angles; correlations between esds in cell parameters are only 
 used when they are defined by crystal symmetry.  An approximate (isotropic) 
 treatment of cell esds is used for estimating esds involving l.s. planes. 
; 
 
loop_ 
 _geom_bond_atom_site_label_1 
 _geom_bond_atom_site_label_2 
 _geom_bond_distance 
 _geom_bond_site_symmetry_2 
 _geom_bond_publ_flag 
Cs1A O6W 2.881(10) 1_455 ? 
Cs1A O14W 2.92(2) . ? 
Cs1A O14 3.046(8) . ? 
Cs1A O13W 3.204(10) . ? 
Cs1A O24 3.275(8) 1_565 ? 
Cs1A O5 3.59(2) 1_455 ? 
Cs1A O17 3.669(7) 2_666 ? 
Cs1B O14W 2.15(3) . ? 
Cs1B O14 3.047(8) . ? 
Cs1B O24 3.184(8) 1_565 ? 
Cs1B O13W 3.217(10) . ? 
Cs1B O6W 3.365(10) 1_455 ? 
Cs1B O17 3.471(7) 2_666 ? 
Cs1B O12 3.597(8) . ? 
Cs2 O24 3.138(7) 1_565 ? 
Cs2 O7 3.162(7) 2_665 ? 
Cs2 O8W 3.187(8) 1_565 ? 
Cs2 O3W 3.200(9) 2_666 ? 
Cs2 O12 3.237(8) . ? 
Cs2 O7W 3.330(9) 1_565 ? 
Cs2 O28 3.408(8) 1_665 ? 
Cs2 O23 3.440(7) 1_565 ? 
Co1 O9 2.038(7) . ? 
Co1 O1 2.072(6) . ? 
Co1 O22 2.078(6) . ? 
Co1 O25 2.108(6) . ? 
Co1 O8 2.113(6) . ? 
Co1 O6 2.119(7) . ? 
Co2 O8 2.056(6) . ? 
Co2 O4 2.060(7) . ? 
Co2 O16 2.076(7) . ? 
Co2 O15 2.087(6) . ? 
Co2 O1 2.099(6) . ? 
Co2 O11 2.154(6) . ? 
Co3 O23 2.081(7) . ? 
Co3 O15 2.097(6) . ? 
Co3 O18 2.098(7) . ? 
Co3 O22 2.113(6) . ? 
Co3 O2 2.117(7) . ? 
Co3 O1 2.157(6) . ? 
Co4 O21 2.066(7) . ? 
Co4 O8 2.080(6) . ? 
Co4 O22 2.099(6) . ? 
Co4 O13 2.104(6) . ? 
Co4 O27 2.131(6) . ? 
Co4 O15 2.149(6) . ? 
Co5 O20 2.084(7) . ? 
Co5 O12 2.087(7) 2_666 ? 
Co5 O2W 2.087(9) . ? 
Co5 O3W 2.099(8) . ? 
Co5 O1W 2.103(7) . ? 
Co5 O4W 2.150(11) . ? 
Co6 O5W 2.057(8) 2_766 ? 
Co6 O5W 2.057(8) . ? 
Co6 O17 2.110(6) . ? 
Co6 O17 2.110(6) 2_766 ? 
Co6 O6W 2.128(9) 2_766 ? 
Co6 O6W 2.128(9) . ? 
Co7 O9W 2.128(8) . ? 
Co7 O8W 2.149(8) . ? 
Co7 O3 2.152(7) . ? 
Co7 O7W 2.177(8) . ? 
Co7 O7 2.180(8) 2_655 ? 
Co7 O6 2.229(7) 2_655 ? 
Co7 O2 2.400(6) . ? 
Co8 O12W 2.061(7) . ? 
Co8 O12W 2.061(7) 2_565 ? 
Co8 O11W 2.099(7) 2_565 ? 
Co8 O11W 2.099(7) . ? 
Co8 O10W 2.158(8) . ? 
Co8 O10W 2.158(8) 2_565 ? 
O1 C1 1.411(10) . ? 
O2 C2 1.234(12) . ? 
O3 C2 1.247(11) . ? 
O4 C4 1.293(14) . ? 
O5 C4 1.200(15) . ? 
O5 Cs1A 3.59(2) 1_655 ? 
O6 C6 1.299(12) . ? 
O6 Co7 2.229(7) 2_655 ? 
O7 C6 1.263(12) . ? 
O7 Co7 2.180(8) 2_655 ? 
O7 Cs2 3.162(7) 2_665 ? 
O8 C7 1.431(10) . ? 
O9 C9 1.308(11) . ? 
O10 C9 1.229(12) . ? 
O11 C11 1.245(12) . ? 
O12 C11 1.272(12) . ? 
O12 Co5 2.087(7) 2_666 ? 
O13 C12 1.234(12) . ? 
O14 C12 1.265(11) . ? 
O15 C13 1.402(11) . ? 
O16 C14 1.251(12) . ? 
O17 C14 1.262(11) . ? 
O17 Cs1B 3.471(7) 2_666 ? 
O17 Cs1A 3.669(7) 2_666 ? 
O18 C16 1.239(12) . ? 
O19 C16 1.272(12) . ? 
O20 C18 1.265(12) . ? 
O21 C18 1.260(12) . ? 
O22 C19 1.396(11) . ? 
O23 C21 1.264(12) . ? 
O23 Cs2 3.440(7) 1_545 ? 
O24 C21 1.252(12) . ? 
O24 Cs2 3.138(7) 1_545 ? 
O24 Cs1B 3.184(8) 1_545 ? 
O24 Cs1A 3.275(8) 1_545 ? 
O25 C22 1.275(12) . ? 
O26 C22 1.219(11) . ? 
O27 C24 1.252(12) . ? 
O28 C24 1.244(11) . ? 
O28 Cs2 3.408(8) 1_445 ? 
O3W Cs2 3.200(9) 2_666 ? 
O6W Cs1A 2.881(10) 1_655 ? 
O6W Cs1B 3.365(10) 1_655 ? 
O7W Cs2 3.330(9) 1_545 ? 
O8W Cs2 3.187(8) 1_545 ? 
C1 C5 1.535(14) . ? 
C1 C2 1.539(12) . ? 
C1 C3 1.558(14) . ? 
C3 C4 1.456(19) . ? 
C3 H3A 0.9700 . ? 
C3 H3B 0.9700 . ? 
C5 C6 1.481(14) . ? 
C5 H5A 0.9700 . ? 
C5 H5B 0.9700 . ? 
C7 C8 1.537(14) . ? 
C7 C10 1.547(13) . ? 
C7 C12 1.563(12) . ? 
C8 C9 1.482(14) . ? 
C8 H8A 0.9700 . ? 
C8 H8B 0.9700 . ? 
C10 C11 1.524(14) . ? 
C10 H10A 0.9700 . ? 
C10 H10B 0.9700 . ? 
C13 C17 1.517(12) . ? 
C13 C15 1.529(13) . ? 
C13 C14 1.548(13) . ? 
C15 C16 1.532(12) . ? 
C15 H15A 0.9700 . ? 
C15 H15B 0.9700 . ? 
C17 C18 1.509(14) . ? 
C17 H17A 0.9700 . ? 
C17 H17B 0.9700 . ? 
C19 C20 1.530(12) . ? 
C19 C22 1.545(14) . ? 
C19 C23 1.574(12) . ? 
C20 C21 1.513(14) . ? 
C20 H20A 0.9700 . ? 
C20 H20B 0.9700 . ? 
C23 C24 1.522(13) . ? 
C23 H23A 0.9700 . ? 
C23 H23B 0.9700 . ? 
 
loop_ 
 _geom_angle_atom_site_label_1 
 _geom_angle_atom_site_label_2 
 _geom_angle_atom_site_label_3 
 _geom_angle 
 _geom_angle_site_symmetry_1 
 _geom_angle_site_symmetry_3 
 _geom_angle_publ_flag 
O6W Cs1A O14W 125.7(5) 1_455 . ? 
O6W Cs1A O14 87.9(2) 1_455 . ? 
O14W Cs1A O14 103.1(4) . . ? 
O6W Cs1A O13W 61.9(3) 1_455 . ? 
O14W Cs1A O13W 73.8(4) . . ? 
O14 Cs1A O13W 134.3(2) . . ? 
O6W Cs1A O24 162.0(2) 1_455 1_565 ? 
O14W Cs1A O24 62.9(4) . 1_565 ? 
O14 Cs1A O24 106.24(19) . 1_565 ? 
O13W Cs1A O24 111.7(2) . 1_565 ? 
O6W Cs1A O5 74.3(2) 1_455 1_455 ? 
O14W Cs1A O5 138.0(5) . 1_455 ? 
O14 Cs1A O5 115.1(3) . 1_455 ? 
O13W Cs1A O5 90.3(2) . 1_455 ? 
O24 Cs1A O5 89.3(2) 1_565 1_455 ? 
O6W Cs1A O17 50.21(19) 1_455 2_666 ? 
O14W Cs1A O17 86.3(4) . 2_666 ? 
O14 Cs1A O17 65.38(19) . 2_666 ? 
O13W Cs1A O17 68.9(2) . 2_666 ? 
O24 Cs1A O17 146.10(18) 1_565 2_666 ? 
O5 Cs1A O17 124.4(2) 1_455 2_666 ? 
O14W Cs1B O14 127.2(6) . . ? 
O14W Cs1B O24 72.0(6) . 1_565 ? 
O14 Cs1B O24 108.6(2) . 1_565 ? 
O14W Cs1B O13W 84.2(6) . . ? 
O14 Cs1B O13W 133.7(2) . . ? 
O24 Cs1B O13W 113.9(2) 1_565 . ? 
O14W Cs1B O6W 137.4(6) . 1_455 ? 
O14 Cs1B O6W 79.7(2) . 1_455 ? 
O24 Cs1B O6W 136.4(2) 1_565 1_455 ? 
O13W Cs1B O6W 57.0(2) . 1_455 ? 
O14W Cs1B O17 105.2(6) . 2_666 ? 
O14 Cs1B O17 68.06(19) . 2_666 ? 
O24 Cs1B O17 173.4(2) 1_565 2_666 ? 
O13W Cs1B O17 71.3(2) . 2_666 ? 
O6W Cs1B O17 49.60(18) 1_455 2_666 ? 
O14W Cs1B O12 60.3(5) . . ? 
O14 Cs1B O12 69.20(19) . . ? 
O24 Cs1B O12 73.63(19) 1_565 . ? 
O13W Cs1B O12 140.3(2) . . ? 
O6W Cs1B O12 143.6(2) 1_455 . ? 
O17 Cs1B O12 99.74(18) 2_666 . ? 
O24 Cs2 O7 71.34(19) 1_565 2_665 ? 
O24 Cs2 O8W 122.30(19) 1_565 1_565 ? 
O7 Cs2 O8W 51.04(19) 2_665 1_565 ? 
O24 Cs2 O3W 105.32(19) 1_565 2_666 ? 
O7 Cs2 O3W 126.9(2) 2_665 2_666 ? 
O8W Cs2 O3W 110.7(2) 1_565 2_666 ? 
O24 Cs2 O12 79.49(19) 1_565 . ? 
O7 Cs2 O12 150.50(18) 2_665 . ? 
O8W Cs2 O12 158.17(19) 1_565 . ? 
O3W Cs2 O12 56.86(19) 2_666 . ? 
O24 Cs2 O7W 108.54(18) 1_565 1_565 ? 
O7 Cs2 O7W 66.36(19) 2_665 1_565 ? 
O8W Cs2 O7W 54.3(2) 1_565 1_565 ? 
O3W Cs2 O7W 65.1(2) 2_666 1_565 ? 
O12 Cs2 O7W 121.19(18) . 1_565 ? 
O24 Cs2 O28 151.72(19) 1_565 1_665 ? 
O7 Cs2 O28 118.4(2) 2_665 1_665 ? 
O8W Cs2 O28 73.8(2) 1_565 1_665 ? 
O3W Cs2 O28 46.82(19) 2_666 1_665 ? 
O12 Cs2 O28 85.8(2) . 1_665 ? 
O7W Cs2 O28 59.53(19) 1_565 1_665 ? 
O24 Cs2 O23 38.67(17) 1_565 1_565 ? 
O7 Cs2 O23 67.50(17) 2_665 1_565 ? 
O8W Cs2 O23 109.01(19) 1_565 1_565 ? 
O3W Cs2 O23 78.33(19) 2_666 1_565 ? 
O12 Cs2 O23 87.04(18) . 1_565 ? 
O7W Cs2 O23 72.27(17) 1_565 1_565 ? 
O28 Cs2 O23 117.13(17) 1_665 1_565 ? 
O9 Co1 O1 114.9(3) . . ? 
O9 Co1 O22 157.3(2) . . ? 
O1 Co1 O22 82.8(2) . . ? 
O9 Co1 O25 88.6(3) . . ? 
O1 Co1 O25 154.9(3) . . ? 
O22 Co1 O25 77.2(2) . . ? 
O9 Co1 O8 86.4(3) . . ? 
O1 Co1 O8 79.8(2) . . ? 
O22 Co1 O8 82.8(2) . . ? 
O25 Co1 O8 112.2(2) . . ? 
O9 Co1 O6 84.4(3) . . ? 
O1 Co1 O6 87.8(2) . . ? 
O22 Co1 O6 111.6(2) . . ? 
O25 Co1 O6 85.6(3) . . ? 
O8 Co1 O6 159.7(2) . . ? 
O8 Co2 O4 115.1(3) . . ? 
O8 Co2 O16 153.0(3) . . ? 
O4 Co2 O16 88.4(3) . . ? 
O8 Co2 O15 83.5(2) . . ? 
O4 Co2 O15 157.9(3) . . ? 
O16 Co2 O15 77.2(3) . . ? 
O8 Co2 O1 80.5(2) . . ? 
O4 Co2 O1 88.3(3) . . ? 
O16 Co2 O1 115.2(3) . . ? 
O15 Co2 O1 82.9(2) . . ? 
O8 Co2 O11 85.5(2) . . ? 
O4 Co2 O11 84.5(3) . . ? 
O16 Co2 O11 83.6(3) . . ? 
O15 Co2 O11 110.0(3) . . ? 
O1 Co2 O11 159.8(3) . . ? 
O23 Co3 O15 119.2(3) . . ? 
O23 Co3 O18 85.9(3) . . ? 
O15 Co3 O18 87.6(2) . . ? 
O23 Co3 O22 88.0(2) . . ? 
O15 Co3 O22 78.7(2) . . ? 
O18 Co3 O22 159.7(3) . . ? 
O23 Co3 O2 90.1(3) . . ? 
O15 Co3 O2 148.6(3) . . ? 
O18 Co3 O2 83.1(3) . . ? 
O22 Co3 O2 116.2(3) . . ? 
O23 Co3 O1 153.8(3) . . ? 
O15 Co3 O1 81.3(2) . . ? 
O18 Co3 O1 112.7(3) . . ? 
O22 Co3 O1 80.0(2) . . ? 
O2 Co3 O1 74.9(2) . . ? 
O21 Co4 O8 155.7(3) . . ? 
O21 Co4 O22 113.6(3) . . ? 
O8 Co4 O22 83.1(2) . . ? 
O21 Co4 O13 89.6(3) . . ? 
O8 Co4 O13 77.6(2) . . ? 
O22 Co4 O13 155.5(3) . . ? 
O21 Co4 O27 88.3(3) . . ? 
O8 Co4 O27 111.1(3) . . ? 
O22 Co4 O27 86.3(2) . . ? 
O13 Co4 O27 86.8(3) . . ? 
O21 Co4 O15 85.0(2) . . ? 
O8 Co4 O15 81.4(2) . . ? 
O22 Co4 O15 77.8(2) . . ? 
O13 Co4 O15 113.4(3) . . ? 
O27 Co4 O15 158.6(2) . . ? 
O20 Co5 O12 91.8(3) . 2_666 ? 
O20 Co5 O2W 97.8(3) . . ? 
O12 Co5 O2W 94.0(3) 2_666 . ? 
O20 Co5 O3W 86.4(3) . . ? 
O12 Co5 O3W 94.1(3) 2_666 . ? 
O2W Co5 O3W 170.7(4) . . ? 
O20 Co5 O1W 173.7(3) . . ? 
O12 Co5 O1W 88.4(3) 2_666 . ? 
O2W Co5 O1W 88.5(3) . . ? 
O3W Co5 O1W 87.3(3) . . ? 
O20 Co5 O4W 91.7(4) . . ? 
O12 Co5 O4W 174.6(4) 2_666 . ? 
O2W Co5 O4W 81.3(5) . . ? 
O3W Co5 O4W 90.3(5) . . ? 
O1W Co5 O4W 88.6(5) . . ? 
O5W Co6 O17 93.6(3) . . ? 
O5W Co6 O17 86.4(3) . 2_766 ? 
O5W Co6 O6W 89.6(4) . 2_766 ? 
O17 Co6 O6W 85.2(3) . 2_766 ? 
O5W Co6 O6W 90.4(4) . . ? 
O17 Co6 O6W 94.8(3) . . ? 
O9W Co7 O8W 84.3(3) . . ? 
O9W Co7 O3 81.3(3) . . ? 
O8W Co7 O3 162.1(3) . . ? 
O9W Co7 O7W 88.0(3) . . ? 
O8W Co7 O7W 87.0(3) . . ? 
O3 Co7 O7W 103.1(3) . . ? 
O9W Co7 O7 154.5(3) . 2_655 ? 
O8W Co7 O7 78.4(3) . 2_655 ? 
O3 Co7 O7 111.2(3) . 2_655 ? 
O7W Co7 O7 109.4(3) . 2_655 ? 
O9W Co7 O6 101.2(3) . 2_655 ? 
O8W Co7 O6 85.7(3) . 2_655 ? 
O3 Co7 O6 86.6(3) . 2_655 ? 
O7W Co7 O6 167.6(3) . 2_655 ? 
O7 Co7 O6 59.2(2) 2_655 2_655 ? 
O9W Co7 O2 127.1(3) . . ? 
O8W Co7 O2 141.4(3) . . ? 
O3 Co7 O2 56.4(3) . . ? 
O7W Co7 O2 74.1(3) . . ? 
O7 Co7 O2 76.8(3) 2_655 . ? 
O6 Co7 O2 105.9(2) 2_655 . ? 
O12W Co8 O11W 87.8(3) . 2_565 ? 
O12W Co8 O11W 92.2(3) . . ? 
O12W Co8 O10W 94.6(3) . . ? 
O11W Co8 O10W 88.8(3) . . ? 
O12W Co8 O10W 85.4(3) . 2_565 ? 
O11W Co8 O10W 91.2(3) . 2_565 ? 
C1 O1 Co1 121.2(5) . . ? 
C1 O1 Co2 122.5(5) . . ? 
Co1 O1 Co2 99.8(2) . . ? 
C1 O1 Co3 115.1(5) . . ? 
Co1 O1 Co3 97.1(2) . . ? 
Co2 O1 Co3 95.8(3) . . ? 
C2 O2 Co3 118.8(6) . . ? 
C2 O2 Co7 85.4(5) . . ? 
Co3 O2 Co7 153.7(4) . . ? 
C2 O3 Co7 96.7(6) . . ? 
C4 O4 Co2 120.2(8) . . ? 
C4 O5 Cs1A 112.5(16) . 1_655 ? 
C6 O6 Co1 115.6(6) . . ? 
C6 O6 Co7 90.3(6) . 2_655 ? 
Co1 O6 Co7 134.4(3) . 2_655 ? 
C6 O7 Co7 93.5(6) . 2_655 ? 
C6 O7 Cs2 144.1(6) . 2_665 ? 
Co7 O7 Cs2 90.3(2) 2_655 2_665 ? 
C7 O8 Co2 120.6(5) . . ? 
C7 O8 Co4 114.1(5) . . ? 
Co2 O8 Co4 98.3(3) . . ? 
C7 O8 Co1 123.2(5) . . ? 
Co2 O8 Co1 99.9(2) . . ? 
Co4 O8 Co1 95.5(2) . . ? 
C9 O9 Co1 123.7(6) . . ? 
C11 O11 Co2 111.9(6) . . ? 
C11 O12 Co5 124.7(7) . 2_666 ? 
C11 O12 Cs2 108.7(6) . . ? 
Co5 O12 Cs2 100.2(3) 2_666 . ? 
C11 O12 Cs1B 97.3(6) . . ? 
Co5 O12 Cs1B 124.9(3) 2_666 . ? 
Cs2 O12 Cs1B 97.3(2) . . ? 
C12 O13 Co4 115.9(6) . . ? 
C12 O14 Cs1A 150.3(7) . . ? 
C12 O14 Cs1B 145.2(6) . . ? 
C13 O15 Co2 113.7(5) . . ? 
C13 O15 Co3 120.8(5) . . ? 
Co2 O15 Co3 98.0(2) . . ? 
C13 O15 Co4 122.8(5) . . ? 
Co2 O15 Co4 95.2(2) . . ? 
Co3 O15 Co4 101.0(2) . . ? 
C14 O16 Co2 117.0(6) . . ? 
C14 O17 Co6 124.3(6) . . ? 
C14 O17 Cs1B 129.6(5) . 2_666 ? 
Co6 O17 Cs1B 105.1(2) . 2_666 ? 
C14 O17 Cs1A 143.0(5) . 2_666 ? 
Co6 O17 Cs1A 91.8(2) . 2_666 ? 
C16 O18 Co3 121.8(6) . . ? 
C18 O20 Co5 118.7(6) . . ? 
C18 O21 Co4 120.4(6) . . ? 
C19 O22 Co1 113.8(5) . . ? 
C19 O22 Co4 119.3(5) . . ? 
Co1 O22 Co4 96.0(2) . . ? 
C19 O22 Co3 122.4(5) . . ? 
Co1 O22 Co3 98.2(2) . . ? 
Co4 O22 Co3 102.1(3) . . ? 
C21 O23 Co3 122.5(6) . . ? 
C21 O23 Cs2 82.8(5) . 1_545 ? 
Co3 O23 Cs2 127.2(3) . 1_545 ? 
C21 O24 Cs2 96.8(6) . 1_545 ? 
C21 O24 Cs1B 109.2(6) . 1_545 ? 
Cs2 O24 Cs1B 108.6(2) 1_545 1_545 ? 
C21 O24 Cs1A 112.7(6) . 1_545 ? 
Cs2 O24 Cs1A 121.5(2) 1_545 1_545 ? 
C22 O25 Co1 115.7(6) . . ? 
C24 O27 Co4 115.5(6) . . ? 
C24 O28 Cs2 138.0(7) . 1_445 ? 
Co5 O3W Cs2 101.1(3) . 2_666 ? 
Co6 O6W Cs1A 117.0(4) . 1_655 ? 
Co6 O6W Cs1B 108.2(3) . 1_655 ? 
Co7 O7W Cs2 86.0(3) . 1_545 ? 
Co7 O8W Cs2 90.2(2) . 1_545 ? 
O1 C1 C5 112.4(7) . . ? 
O1 C1 C2 108.5(7) . . ? 
C5 C1 C2 108.6(8) . . ? 
O1 C1 C3 109.9(7) . . ? 
C5 C1 C3 110.5(9) . . ? 
C2 C1 C3 106.7(8) . . ? 
O2 C2 O3 121.4(9) . . ? 
O2 C2 C1 118.6(8) . . ? 
O3 C2 C1 120.0(9) . . ? 
C4 C3 C1 114.6(10) . . ? 
C4 C3 H3A 108.6 . . ? 
C1 C3 H3A 108.6 . . ? 
C4 C3 H3B 108.6 . . ? 
C1 C3 H3B 108.6 . . ? 
H3A C3 H3B 107.6 . . ? 
O5 C4 O4 120.1(14) . . ? 
O5 C4 C3 118.5(13) . . ? 
O4 C4 C3 120.8(10) . . ? 
C6 C5 C1 116.6(8) . . ? 
C6 C5 H5A 108.2 . . ? 
C1 C5 H5A 108.2 . . ? 
C6 C5 H5B 108.2 . . ? 
C1 C5 H5B 108.2 . . ? 
H5A C5 H5B 107.3 . . ? 
O7 C6 O6 116.5(9) . . ? 
O7 C6 C5 122.5(9) . . ? 
O6 C6 C5 121.0(9) . . ? 
O8 C7 C8 109.7(7) . . ? 
O8 C7 C10 110.6(7) . . ? 
C8 C7 C10 109.7(8) . . ? 
O8 C7 C12 106.9(7) . . ? 
C8 C7 C12 110.6(7) . . ? 
C10 C7 C12 109.3(8) . . ? 
C9 C8 C7 112.6(8) . . ? 
C9 C8 H8A 109.1 . . ? 
C7 C8 H8A 109.1 . . ? 
C9 C8 H8B 109.1 . . ? 
C7 C8 H8B 109.1 . . ? 
H8A C8 H8B 107.8 . . ? 
O10 C9 O9 119.7(9) . . ? 
O10 C9 C8 122.0(8) . . ? 
O9 C9 C8 118.3(8) . . ? 
C11 C10 C7 113.6(8) . . ? 
C11 C10 H10A 108.8 . . ? 
C7 C10 H10A 108.8 . . ? 
C11 C10 H10B 108.8 . . ? 
C7 C10 H10B 108.8 . . ? 
H10A C10 H10B 107.7 . . ? 
O11 C11 O12 124.1(10) . . ? 
O11 C11 C10 120.4(9) . . ? 
O12 C11 C10 115.5(9) . . ? 
O13 C12 O14 125.9(9) . . ? 
O13 C12 C7 119.3(8) . . ? 
O14 C12 C7 114.8(9) . . ? 
O15 C13 C17 110.6(7) . . ? 
O15 C13 C15 111.9(7) . . ? 
C17 C13 C15 110.0(8) . . ? 
O15 C13 C14 109.5(7) . . ? 
C17 C13 C14 107.4(7) . . ? 
C15 C13 C14 107.4(7) . . ? 
O16 C14 O17 125.1(9) . . ? 
O16 C14 C13 116.9(8) . . ? 
O17 C14 C13 118.0(9) . . ? 
C13 C15 C16 112.9(8) . . ? 
C13 C15 H15A 109.0 . . ? 
C16 C15 H15A 109.0 . . ? 
C13 C15 H15B 109.0 . . ? 
C16 C15 H15B 109.0 . . ? 
H15A C15 H15B 107.8 . . ? 
O18 C16 O19 121.9(8) . . ? 
O18 C16 C15 119.0(8) . . ? 
O19 C16 C15 119.1(9) . . ? 
C18 C17 C13 114.9(8) . . ? 
C18 C17 H17A 108.5 . . ? 
C13 C17 H17A 108.5 . . ? 
C18 C17 H17B 108.5 . . ? 
C13 C17 H17B 108.5 . . ? 
H17A C17 H17B 107.5 . . ? 
O21 C18 O20 120.9(9) . . ? 
O21 C18 C17 120.6(9) . . ? 
O20 C18 C17 118.4(9) . . ? 
O22 C19 C20 110.4(7) . . ? 
O22 C19 C22 110.6(8) . . ? 
C20 C19 C22 107.3(8) . . ? 
O22 C19 C23 110.3(7) . . ? 
C20 C19 C23 110.9(8) . . ? 
C22 C19 C23 107.3(7) . . ? 
C21 C20 C19 112.7(8) . . ? 
C21 C20 H20A 109.1 . . ? 
C19 C20 H20A 109.1 . . ? 
C21 C20 H20B 109.1 . . ? 
C19 C20 H20B 109.1 . . ? 
H20A C20 H20B 107.8 . . ? 
O24 C21 O23 121.7(9) . . ? 
O24 C21 C20 119.3(9) . . ? 
O23 C21 C20 119.0(9) . . ? 
O26 C22 O25 124.1(9) . . ? 
O26 C22 C19 119.6(9) . . ? 
O25 C22 C19 116.3(8) . . ? 
C24 C23 C19 111.8(8) . . ? 
C24 C23 H23A 109.3 . . ? 
C19 C23 H23A 109.3 . . ? 
C24 C23 H23B 109.3 . . ? 
C19 C23 H23B 109.3 . . ? 
H23A C23 H23B 107.9 . . ? 
O28 C24 O27 123.1(9) . . ? 
O28 C24 C23 117.6(9) . . ? 
O27 C24 C23 119.3(8) . . ? 
 
loop_ 
 _geom_torsion_atom_site_label_1 
 _geom_torsion_atom_site_label_2 
 _geom_torsion_atom_site_label_3 
 _geom_torsion_atom_site_label_4 
 _geom_torsion 
 _geom_torsion_site_symmetry_1 
 _geom_torsion_site_symmetry_2 
 _geom_torsion_site_symmetry_3 
 _geom_torsion_site_symmetry_4 
 _geom_torsion_publ_flag 
O1 C1 C2 O2 -9.6(12) . . . . ? 
C5 C1 C2 O2 -132.1(9) . . . . ? 
C3 C1 C2 O2 108.8(10) . . . . ? 
O1 C1 C2 O3 171.5(8) . . . . ? 
C5 C1 C2 O3 49.0(11) . . . . ? 
C3 C1 C2 O3 -70.1(11) . . . . ? 
O1 C1 C3 C4 -68.1(12) . . . . ? 
C5 C1 C3 C4 56.6(11) . . . . ? 
C2 C1 C3 C4 174.5(9) . . . . ? 
C1 C3 C4 O5 -135.8(17) . . . . ? 
C1 C3 C4 O4 53.0(17) . . . . ? 
O1 C1 C5 C6 -65.7(10) . . . . ? 
C2 C1 C5 C6 54.3(10) . . . . ? 
C3 C1 C5 C6 171.0(7) . . . . ? 
C1 C5 C6 O7 -147.3(8) . . . . ? 
C1 C5 C6 O6 34.0(11) . . . . ? 
O8 C7 C8 C9 -69.9(10) . . . . ? 
C10 C7 C8 C9 51.7(10) . . . . ? 
C12 C7 C8 C9 172.4(8) . . . . ? 
C7 C8 C9 O10 -125.9(10) . . . . ? 
C7 C8 C9 O9 56.7(11) . . . . ? 
O8 C7 C10 C11 -68.2(9) . . . . ? 
C8 C7 C10 C11 170.8(7) . . . . ? 
C12 C7 C10 C11 49.3(10) . . . . ? 
C7 C10 C11 O11 26.6(12) . . . . ? 
C7 C10 C11 O12 -154.9(8) . . . . ? 
C7 C10 C11 Cs2 169.6(7) . . . . ? 
O8 C7 C12 O13 -15.4(12) . . . . ? 
C8 C7 C12 O13 103.9(10) . . . . ? 
C10 C7 C12 O13 -135.2(9) . . . . ? 
O8 C7 C12 O14 167.9(8) . . . . ? 
C8 C7 C12 O14 -72.8(11) . . . . ? 
C10 C7 C12 O14 48.1(11) . . . . ? 
O15 C13 C14 O16 9.3(10) . . . . ? 
C17 C13 C14 O16 -110.8(9) . . . . ? 
C15 C13 C14 O16 130.9(8) . . . . ? 
O15 C13 C14 O17 -170.5(7) . . . . ? 
C17 C13 C14 O17 69.4(10) . . . . ? 
C15 C13 C14 O17 -48.9(10) . . . . ? 
O15 C13 C15 C16 71.3(10) . . . . ? 
C17 C13 C15 C16 -165.4(8) . . . . ? 
C14 C13 C15 C16 -48.8(10) . . . . ? 
C13 C15 C16 O18 -48.3(12) . . . . ? 
C13 C15 C16 O19 128.5(9) . . . . ? 
O15 C13 C17 C18 65.4(11) . . . . ? 
C15 C13 C17 C18 -58.7(11) . . . . ? 
C14 C13 C17 C18 -175.3(8) . . . . ? 
C13 C17 C18 O21 -46.0(13) . . . . ? 
C13 C17 C18 O20 133.8(9) . . . . ? 
O22 C19 C20 C21 71.4(10) . . . . ? 
C22 C19 C20 C21 -168.0(8) . . . . ? 
C23 C19 C20 C21 -51.1(10) . . . . ? 
C19 C20 C21 O24 121.9(9) . . . . ? 
C19 C20 C21 O23 -57.7(11) . . . . ? 
O22 C19 C22 O26 -172.2(8) . . . . ? 
C20 C19 C22 O26 67.4(11) . . . . ? 
C23 C19 C22 O26 -51.9(11) . . . . ? 
O22 C19 C22 O25 8.3(11) . . . . ? 
C20 C19 C22 O25 -112.2(9) . . . . ? 
C23 C19 C22 O25 128.6(8) . . . . ? 
O22 C19 C23 C24 74.6(10) . . . . ? 
C20 C19 C23 C24 -162.9(8) . . . . ? 
C22 C19 C23 C24 -45.9(10) . . . . ? 
C19 C23 C24 O28 141.3(9) . . . . ? 
C19 C23 C24 O27 -38.1(12) . . . . ? 
 
loop_ 
 _geom_hbond_atom_site_label_D 
 _geom_hbond_atom_site_label_H 
 _geom_hbond_atom_site_label_A 
 _geom_hbond_distance_DH 
 _geom_hbond_distance_HA 
 _geom_hbond_distance_DA 
 _geom_hbond_angle_DHA 
 _geom_hbond_site_symmetry_A 
C20 H20A O11W  0.97 2.71 3.420(12) 130.1 1_545 
 
_diffrn_measured_fraction_theta_max    0.994 
_diffrn_reflns_theta_full              27.50 
_diffrn_measured_fraction_theta_full   0.994 
_refine_diff_density_max    2.173 
_refine_diff_density_min   -1.329 
_refine_diff_density_rms    0.173 
